# Supplementary material for: Impact of tumor size on hepatectomy outcomes in hepatocellular carcinoma: a nationwide propensity score matching analysis
Source: PubMed Central journal article supplement — Ann Surg Treat Res. 2022 Apr 5;102(4):193–204. doi: 10.4174/astr.2022.102.4.193 (PMC9010965; doi:10.4174/astr.2022.102.4.193), 2022-04-05
Supplement: astr-102-193-s002.pdf [file astr-102-193-s002.pdf]

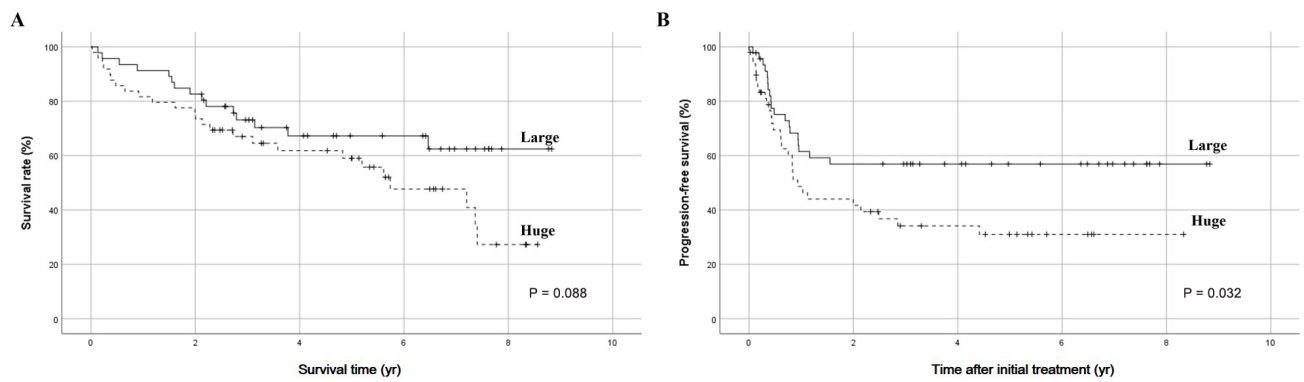

**Supplementary Fig. 2.** Kaplan-Meier analysis of survival comparing large and huge groups after excluding patients with multiple hepatocellular carcinomas. (A) Overall survival, (B) progression-free survival.
